# Supplementary material for: Kukaa Salama (Staying Safe): study protocol for a pre/post-trial of an interactive mHealth intervention for increasing COVID-19 prevention practices with urban refugee youth in Kampala, Uganda
Source: PubMed Central journal article supplement — BMJ Open. 2021 Nov 22;11(11):e055530. doi: 10.1136/bmjopen-2021-055530 (PMC8609499; doi:10.1136/bmjopen-2021-055530), 2021-11-22
Supplement: bmjopen-2021-055530.reviewer_comments.pdf [file bmjopen-2021-055530.reviewer_comments.pdf]

## PEER REVIEW HISTORY

BMJ Open publishes all reviews undertaken for accepted manuscripts. Reviewers are asked to complete a checklist review form (<http://bmjopen.bmj.com/site/about/resources/checklist.pdf>) and are provided with free text boxes to elaborate on their assessment. These free text comments are reproduced below.

## ARTICLE DETAILS

|                            |                                                                                                                                                                                                  |
|----------------------------|--------------------------------------------------------------------------------------------------------------------------------------------------------------------------------------------------|
| <b>TITLE (PROVISIONAL)</b> | Kukaa Salama (Staying Safe): Study Protocol for a Pre-Post Trial of an Interactive mHealth Intervention for Increasing COVID-19 Prevention Practices with Urban Refugee Youth in Kampala, Uganda |
| <b>AUTHORS</b>             | Logie, Carmen; Okumu, Moses; Berry, Isha; Hakiza, Robert; Kibuuka-Musoke, Daniel; Kyambadde, Peter; Mwima, Simon; Lester, Richard; Perez-Brumer, Amaya; Baral, Stefan; Mbuagbaw, Lawrence        |

This article was not externally reviewed at BMJ Open. Protocols that have been independently assessed prior to submission to BMJ Open are usually fast-tracked to publication on the grounds that further substantial changes will not be possible. This independent assessment will usually be external, independent review for both a substantial grant award from a non-commercial or government funder and ethics approval.
